# Supplementary material
Source: Springer Nature journal article supplement (https://www.springermedizin.de/resource/supplementary/12889_2011_4414_MOESM3_ESM.pdf/9492544)

|                                   |                 | Women               |        |         |        | Men                 |        |         |        |
|-----------------------------------|-----------------|---------------------|--------|---------|--------|---------------------|--------|---------|--------|
|                                   |                 | Alcohol consumption |        |         |        | Alcohol consumption |        |         |        |
|                                   |                 | ≥weekly             |        | <weekly |        | ≥weekly             |        | <weekly |        |
| Physical activity (MET.mins/week) |                 | PA≥600              | PA<600 | PA≥600  | PA<600 | PA≥600              | PA<600 | PA≥600  | PA<600 |
| Cigarette smoking                 | Body mass index |                     |        |         |        |                     |        |         |        |
| Never smoker                      | Normal          | 19                  | 26     | 23      | 31     | 37                  | 46     | 42      | 51     |
|                                   | Overweight      | 16                  | 22     | 19      | 27     | 34                  | 43     | 38      | 48     |
|                                   | Obese           | 19                  | 26     | 23      | 31     | 36                  | 45     | 41      | 51     |
| Ex-smoker                         | Normal          | 25                  | 34     | 30      | 39     | 47                  | 57     | 52      | 62     |
|                                   | Overweight      | 21                  | 29     | 26      | 34     | 44                  | 53     | 49      | 58     |
|                                   | Obese           | 25                  | 34     | 30      | 40     | 47                  | 56     | 52      | 61     |
| Current smoker                    | Normal          | 35                  | 45     | 40      | 51     | 61                  | 70     | 66      | 74     |
|                                   | Overweight      | 30                  | 40     | 36      | 46     | 58                  | 67     | 63      | 71     |
|                                   | Obese           | 35                  | 46     | 41      | 52     | 60                  | 69     | 65      | 73     |

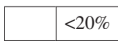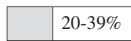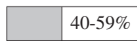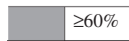

Supplement: MOESM3 [file 9492544]
